# Supplementary material
Source: PubMed Central journal article supplement (PMC7172845)

## Supplemental Data

### A Plasmid-Based Reverse Genetics System

#### for Animal Double-Stranded RNA Viruses

Takeshi Kobayashi, Annukka A.R. Antar, Karl W. Boehme, Pranav Danthi, Elizabeth A. Eby, Kristen M. Guglielmi, Geoffrey H. Holm, Elizabeth M. Johnson, Melissa S. Maginnis, Sam Naik, Wesley B. Skelton, J. Denise Wetzel, Gregory J. Wilson, James D. Chappell, and Terence S. Dermody

**Table S1. Plasmid-based reverse genetics systems for representative RNA viruses**

| Genome          | Virus family                     | Reference                                                                           |
|-----------------|----------------------------------|-------------------------------------------------------------------------------------|
| Plus-sense RNA  | Picornaviruses                   | (Racaniello and Baltimore, 1981)                                                    |
|                 | Flaviviruses                     | (Rice et al., 1989; Gritsun and Gould, 1995; Kinney et al., 1997; Yun et al., 2003) |
|                 | Coronaviruses                    | (Almazan et al., 2000; Yount et al., 2003; Coley et al., 2005)                      |
| Minus-sense RNA | Bornaviruses                     | (Schneider et al., 2005)                                                            |
|                 | Rhabdoviruses                    | (Schnell et al., 1994; Lawson et al., 1995; Whelan et al., 1995)                    |
|                 | Paramyxoviruses                  | (Collins et al., 1995; Garcin et al., 1995; Yoneda et al., 2006)                    |
|                 | Bunyaviruses<br>Orthomyxoviruses | (Bridgen and Elliott, 1996)<br>(Fodor et al., 1999; Neumann et al., 1999)           |

## Supplemental References

Almazan, F., Gonzalez, J. M., Penzes, Z., Izeta, A., Calvo, E., Plana-Duran, J., and Enjuanes, L. (2000). Engineering the largest RNA virus genome as an infectious bacterial artificial chromosome. *Proc. Natl. Acad. Sci. U.S.A.* 97, 5516-5521.

Bridgen, A., and Elliott, R. M. (1996). Rescue of a segmented negative-strand RNA virus entirely from cloned complementary DNAs. *Proc. Natl. Acad. Sci. U.S.A.* 93, 15400-15404.

Coley, S. E., Lavi, E., Sawicki, S. G., Fu, L., Schelle, B., Karl, N., Siddell, S. G., and Thiel, V. (2005). Recombinant mouse hepatitis virus strain A59 from cloned, full-length cDNA replicates to high titers in vitro and is fully pathogenic in vivo. *J. Virol.* 79, 3097-3106.

Collins, P. L., Hill, M. G., Camargo, E., Grosfeld, H., Chanock, R. M., and Murphy, B. R. (1995). Production of infectious human respiratory syncytial virus from cloned cDNA confirms an essential role for the transcription elongation factor from the 5' proximal open reading frame of the M2 mRNA in gene expression and provides a capability for vaccine development. *Proc. Natl. Acad. Sci. U.S.A.* 92, 11563-11567.

Fodor, E., Devenish, L., Engelhardt, O. G., Palese, P., Brownlee, G. G., and Garcia-Sastre, A. (1999). Rescue of influenza A virus from recombinant DNA. *J. Virol.* 73, 9679-9682.

Garcin, D., Pelet, T., Calain, P., Roux, L., Curran, J., and Kolakofsky, D. (1995). A highly recombinogenic system for the recovery of infectious Sendai paramyxovirus from cDNA: generation of a novel copy-back nondefective interfering virus. *EMBO J.* 14, 6087-6094.

Gritsun, T. S., and Gould, E. A. (1995). Infectious transcripts of tick-borne encephalitis virus, generated in days by RT-PCR. *Virology* 214, 611-618.

Kinney, R. M., Butrapet, S., Chang, G. J., Tsuchiya, K. R., Roehrig, J. T., Bhamarapavati, N., and Gubler, D. J. (1997). Construction of infectious cDNA clones for dengue 2 virus: strain 16681 and its attenuated vaccine derivative, strain PDK-53. *Virology* 230, 300-308.

Lawson, N. D., Stillman, E. A., Whitt, M. A., and Rose, J. K. (1995). Recombinant vesicular stomatitis viruses from DNA. *Proc. Natl. Acad. Sci. U.S.A.* *92*, 4477-4481.

Neumann, G., Watanabe, T., Ito, H., Watanabe, S., Goto, H., Gao, P., Hughes, M., Perez, D. R., Donis, R., Hoffmann, E., *et al.* (1999). Generation of influenza A viruses entirely from cloned cDNAs. *Proc. Natl. Acad. Sci. U.S.A.* *96*, 9345-9350.

Racaniello, V. R., and Baltimore, D. (1981). Cloned poliovirus complementary DNA is infectious in mammalian cells. *Science* *214*, 916-919.

Rice, C. M., Grakoui, A., Galler, R., and Chambers, T. J. (1989). Transcription of infectious yellow fever RNA from full-length cDNA templates produced by in vitro ligation. *New Biol.* *1*, 285-296.

Schneider, U., Schwemmler, M., and Staeheli, P. (2005). Genome trimming: a unique strategy for replication control employed by Borna disease virus. *Proc. Natl. Acad. Sci. U.S.A.* *102*, 3441-3446.

Schnell, M. J., Mebatsion, T., and Conzelmann, K. K. (1994). Infectious rabies viruses from cloned cDNA. *EMBO J.* *13*, 4195-4203.

Whelan, S. P., Ball, L. A., Barr, J. N., and Wertz, G. T. (1995). Efficient recovery of infectious vesicular stomatitis virus entirely from cDNA clones. *Proc. Natl. Acad. Sci. U.S.A.* *92*, 8388-8392.

Yoneda, M., Guillaume, V., Ikeda, F., Sakuma, Y., Sato, H., Wild, T. F., and Kai, C. (2006). Establishment of a Nipah virus rescue system. *Proc. Natl. Acad. Sci. U.S.A.* *103*, 16508-16513.

Yount, B., Curtis, K. M., Fritz, E. A., Hensley, L. E., Jahrling, P. B., Prentice, E., Denison, M. R., Geisbert, T. W., and Baric, R. S. (2003). Reverse genetics with a full-length infectious cDNA of severe acute respiratory syndrome coronavirus. *Proc. Natl. Acad. Sci. U.S.A.* *100*, 12995-13000.

Yun, S. I., Kim, S. Y., Rice, C. M., and Lee, Y. M. (2003). Development and application of a reverse genetics system for Japanese encephalitis virus. *J. Virol.* *77*, 6450-6465.

**Table S2. Reovirus Mutants Generated from Cloned cDNA**

| Mutant                 | Nucleotide change                              | Amino acid change                                |
|------------------------|------------------------------------------------|--------------------------------------------------|
| rsT3D- $\sigma$ 1T249I | ACT $\rightarrow$ ATT (757-759)                | Thr $\rightarrow$ Ile (249)                      |
| rsT3D- $\sigma$ 3Y354H | TAT $\rightarrow$ CAC (1092-1094)              | Tyr $\rightarrow$ His (354)                      |
| rsT3D/S4-GFP           | S4 (150-768) $\rightarrow$ GFP ORF*<br>(1-720) | $\sigma$ 3 (40-365) $\rightarrow$ GFP<br>(1-239) |

\*Open reading frame, including termination codon.

**Table S3. GenBank Accession Numbers for Reovirus cDNA Sequences**

| Gene segment cDNA | GenBank accession number |
|-------------------|--------------------------|
| T3D L1            | EF494435                 |
| T3D L2            | EF494436                 |
| T3D L3            | EF494437                 |
| T3D M1            | EF494438                 |
| T3D M2            | EF494439                 |
| T3D M3            | EF494440                 |
| T3D S1            | EF494441                 |
| T3D S2            | EF494442                 |
| T3D S3            | EF494443                 |
| T3D S4            | EF494444                 |
| T1L S1            | EF494445                 |

**Table S4. Oligodeoxynucleotide primers used for plasmid construction**

| Plasmid DNA  | Nucleotide sequence (nucleotide positions) <sup>a</sup> |                                                                                        |
|--------------|---------------------------------------------------------|----------------------------------------------------------------------------------------|
| pT7-L1T3D    | Forward                                                 | 5'-AAACCCGGGTAATACGACTCACTATAGCTACACGTTCCACTTCCACGACAATGT-3' (1-28)                    |
|              | Reverse                                                 | 5'-GGTCGGACCGCGAGGAGGTGGAGATGCCATGCCGACCCGATGAGTTGACGCACCACGACCCAT-3' (3836-3860)      |
| pT7-L2T3D    | Forward                                                 | 5'-TTAGAATTCTAATACGACTCACTATAGCTAAAAGGCGCGATGGCGAACGTTTG-3' (1-27)                     |
|              | Reverse                                                 | 5'-GGTCGGACCGCGAGGAGGTGGAGATGCCATGCCGACCCGATGAATTAGGCGCGCTCACGAGGG-3' (3892-3916)      |
| pT7-L3T3D    | Forward                                                 | 5'-AAACCCGGGAATTCTAATACGACTCACTATAGCTAATCGTCAGGATGAAGCGGATTC-3' (1-26)                 |
|              | Reverse                                                 | 5'-GGTCGGACCGCGAGGAGGTGGAGATGCCATGCCGACCCGATGAATCGGCCCAACTAGCATTGA-3' (3877-3901)      |
| pT7-M1T3D    | Forward                                                 | 5'-AAACCCGGGTAATACGACTCACTATAGCTATTCGCGGTCATGGCTTACATCG-3' (1-26)                      |
|              | Reverse                                                 | 5'-TTTCGGACCGCGAGGAGGTGGAGATGCCATGCCGACCCGATGAAGCGGTACGTAGTC-3' (2285-2304)            |
| pT7-M2T3D    | Forward                                                 | 5'-AAAGAGGAGGTGGAGATGCTCTAGATAATACGACTCACTATAGCTAATCTGCTGACCGT-3' (1-17)               |
|              | Reverse                                                 | 5'-TTTGAGGAGGTGGAGATGCCATGCCGACCCGATGATTTGCCTGCATCCCT-3' (2184-2203)                   |
| pT7-M3T3D    | Forward                                                 | 5'-CCTCGCGGTCCGACCGGTTAATACGACTCACTATAGCTAAAGTGACCG-3' (1-13)                          |
|              | Reverse                                                 | 5'-GGTCGGACCGCGAGGAGGTGGAGATGCCATGCCGACCCGATGAATGGGGTTCGGGAAGGCTTAAGGGA-3' (2212-2241) |
| pBacT7-S1T3D | Forward                                                 | 5'-AAAGAGGAGGTGGAGATGCTCTAGATAATACGACTCACTATAGCTATTGGTCGGATGGATCC-3' (1-20)            |
|              | Reverse                                                 | 5'-AAAGAGGAGGTGGAGATGCCATGCCGACCCGATGAAATGCCCCAGTGCCG-3' (1397-1416)                   |
| pBacT7-S1T1L | Forward                                                 | 5'-AAAGAGGAGGTGGAGATGCTCTAGATAATACGACTCACTATAGCTATTCGCGCCTATGGAT-3' (1-19)             |
|              | Reverse                                                 | 5'-AAAGAGGAGGTGGAGATGCCATGCCGACCCGATGATTGACCCCTTGTGCC-3' (1443-1462)                   |
| pT7-S2T3D    | Forward                                                 | 5'-AAAGAGGAGGTGGAGATGCTCTAGATAATACGACTCACTATAGCTATTCGCTGGTCAGT-3' (1-17)               |
|              | Reverse                                                 | 5'-AAAGAGGAGGTGGAGATGCCATGCCGACCCGATGAATGTGTGGTCAGTCG-3' (1312-1331)                   |
| pT7-S3T3D    | Forward                                                 | 5'-CTCGCGGTCCGGTTAATACGACTCACTATAGCTAAAGTCACGCCTGTCGTCGTCACTATGGCTTCC-3' (1-36)        |
|              | Reverse                                                 | 5'-AGGTCGGACCGCGAGGAGGTGGAGATGCCATGCCGACCCGATGATTAGGCGTC-3' (1185-1198)                |
| pT7-S4T3D    | Forward                                                 | 5'-GGCATGGCATCTCCACCTCCTCGCGGGTTAATACGACTCACTATAGCTATTTTTGCCTCTTCC-3' (1-18)           |
|              | Reverse                                                 | 5'-GAGGAGGTGGAGATGCCATGCCGACCCGATGAATGAAGCCTGTCCC-3' (1178-1196)                       |

pBacT7-S1T3DT249l Forward 5'-CTCAAGGATAGGCGCAATTGAGCAAAGTTACGTGG-3' (741-775)  
Reverse 5'-CCACGTAACCTTTGCTCAATTGCGCCTATCCTTGAG-3' (741-775)

pT7-S4T3DY354H Forward 5'-GGGGATTTGAAT**CACCC**AGTGATGATTGGCGATCCG-3' (1080-1115)  
Reverse 5'-CGGATCGCCAATCATCACTGG**GT**GATTCAAATCCCC-3' (1080-1115)

pT7-S4GFP Forward 5'-GACAAAACAATCTCAGCACAGgaattcCCAGATATGATGG-3' (129-149, 150-162)  
Reverse 5'-CCATCATATCTGGgaattcCTGTGCTGAGATTGTTTTGTC-3' (129-149, 150-162)

---

<sup>a</sup>The T7 promoter sequence is underlined. Nucleotide substitutions are indicated in bold. Nucleotide insertions are indicated in lowercase letters. Numbers in parentheses correspond to nucleotide positions of sequences contained in each gene-specific primer. Reverse primers are numbered according to the complementary nucleotide positions of the plus strand.

## Supplemental Experimental Procedures

### Plasmid construction

To construct T3D L1, L3, and M1 plasmid cDNAs for rescue of recombinant infectious reovirus, RT-PCR products generated using viral genomic RNA and gene-specific primer sets (Table S3) were cloned into the EcoRV-RsrII (L1 and M1) or SmaI-RsrII site (L3) of p3E5EGFP, resulting in pT7-L1T3D, pT7-L3T3D, and pT7-M1T3D. The T3D L2 gene cDNA, amplified from viral genomic RNA with specific primers, was inserted into the EcoRI-RsrII site of pT7-L3T3D, thereby replacing the L3 cDNA and generating pT7-L2T3D. pT7-M2T3D, containing the T3D M2 gene cDNA, was constructed by RT-PCR amplification of the M2 gene using viral genomic RNA and specific primers and insertion of the resultant cDNA into the EcoRV-BseRI site of p3E5EGFP. To construct pT7-M3T3D, pT7-S2T3D, and pT7-S4T3D, which contain the T3D M3, S2, and S4 genes, respectively, RT-PCR amplification products generated using viral genomic RNA and specific primers were inserted into RsrII (M3) and BseRI (S2 and S4) sites of p3E5EGFP. p3E5EGFP constructs containing cloned T3D M3, S2, and S4 genes were treated with the SmaI and AvrII (pT7-M3T3D) or EcoRV and AvrII (pT7-S2T3D and pT7-S4T3D) and self-ligated to remove GFP-encoding sequences and the Ebola virus leader and trailer. The T3D S3 cDNA was amplified by RT-PCR using viral genomic RNA and gene-specific primer sets and inserted into pCR2.1. The pCR2.1-based construct then was used as template for secondary PCR amplification of S3 sequences with the M13-reverse and gene-specific primers, and the amplification product was inserted into the EcoRV-RsrII site of p3E5EGFP to generate pT7-S3T3D. The T1L and T3D S1 cDNAs were amplified by RT-PCR using viral genomic RNA and gene-specific primer sets containing BseRI sites and inserted into pCR2.1. A BseRI fragment containing the S1 cDNA and T7 promoter was subcloned into p3E5EGFP to generate S1-p3E5EGFP. An XbaI fragment of S1-p3E5EGFP containing the S1 cDNA fused to the T7 promoter and HDV ribozyme was inserted into the XbaI site of pBacPak8 (Clontech) to generate pBacT7-S1T1L or pBacT7-S1T3D. To generate pT7-S4GFP, sequences corresponding to the open reading frame (ORF) of enhanced GFP (pEGFP-N1, Clontech) were substituted for S4 gene nucleotide sequences 150-768 in pT7-S4T3D. A unique *EcoRI* site first was introduced into the S4 gene of pT7-S4T3D using the QuickChange site-directed mutagenesis kit, yielding the construct, pT7-S4T3DEcoRI. Subsequently, a PCR product containing the GFP ORF was cloned into the *EcoRI*-*XhoI* site of pT7-S4T3DEcoRI to generate pT7-S4GFP. The construct, pCXN-S4T3D, which contains the entire T3D  $\sigma 3$  ORF, was created by subcloning T3D S4 sequences from pCMVS4wt (Becker et al., 2003) into the



*EcoRI-KpnI* site of pCXNMCS, which was derived by modifying the multiple-cloning site of pCXN2 (Niwa et al., 1991).

#### Supplemental References

Becker, M. M., Peters, T. R. and Dermody, T. S. (2003). Reovirus  $\sigma$ NS and  $\mu$ NS proteins form cytoplasmic inclusion structures in the absence of viral infection. *J. Virol.* 77, 5948-5963.

Niwa, H., Yamamura, K., and Miyazaki, J. (1991). Efficient selection for high-expression transfectants with a novel eukaryotic vector. *Gene* 108, 193-199.

**Figure S1. Kinetics of rsT3D/S4GFP Growth in L cells and L- $\sigma$ 3 cells**

Parental L cells or those stably expressing  $\sigma$ 3 protein (L- $\sigma$ 3) were infected with rsT3D/S4GFP at an MOI of 1 PFU/cell, and viral titers in cell lysates at the time points shown were determined by plaque assay. Results are presented as mean viral titers for triplicate experiments. Error bars indicate SD.

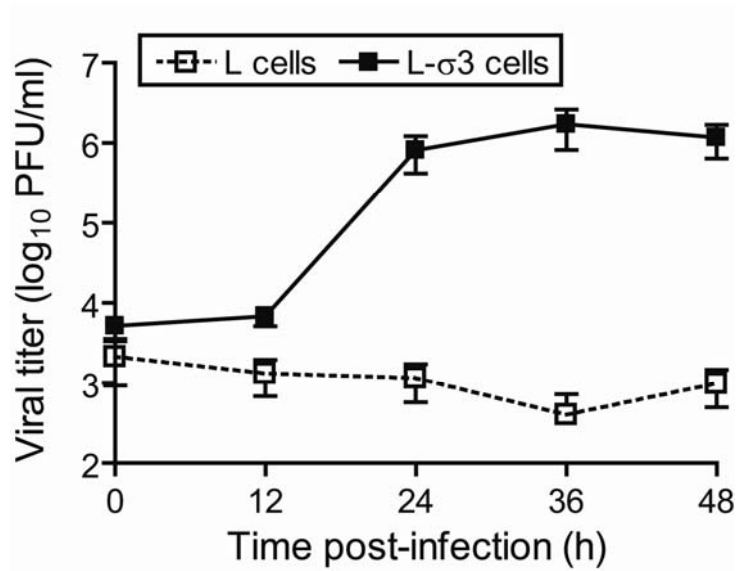

Supplement: mmc1.pdf [file mmc1.pdf]
